# Supplementary material
Source: publisher site journal article supplement (https://www.dovepress.com/article/289446)
Supplement: Supplementary file 1 [file get_supplementary_file.php]

Supplementary materials

Propensity matching score

Appendix 1.

Table S1: Propensity score matching (irAEs＋/－)

Appendix 2.

Table S2: Propensity score matching (prognosis death ＋/－)

Appendix 3.

Table S3: Propensity score matching (prognosis death ＋/－)

Statistical analysis

Propensity-score matching was used to select comparable groups of patients. The propensity matching score was estimated by multivariable logistic regression, and 1-to-1 matching by propensity score was performed by using the nearest neighbour method with a caliper width equal to 0.2 standard deviations. In the regression model, OS and PFS were the dependent variables. The independent variables were age, %PD-1, creatinine, blood glucose, thyroid function, C-peptide, %irAEs, serum cortisol, and number of treatments.
